# Supplementary material for: An intensified chlorination process of 4-nitroaniline in a liquid–liquid microflow system
Source: Royal Society of Chemistry journal article supplement (doi:10.1039/d1re00379h), 2021-01-01
Supplement: d1re00379h1.pdf [file d1re00379h1.pdf]

## **Electronic Supplementary Information**

### **An intensified chlorination process of 4-nitroaniline in liquid-liquid microflow system**

Zhou Lan, Yangcheng Lu\*

State Key Laboratory of Chemical Engineering, Department of Chemical Engineering,  
Tsinghua University, Beijing 100084, China

\*Corresponding author email: [luyc@tsinghua.edu.cn](mailto:luyc@tsinghua.edu.cn)

## Dissolution and reaction of chlorine gas in 1,2-dichloroethane

Carbon tetrachloride, commonly used to dissolve  $\text{Cl}_2$ , was banned due to environmental issues. Other chlorinated solvents included tetrachloroethane, petroleum ether, chlorobenzene, cyclohexane, *n*-hexane, dichloroethane, chloroform, chlorobutane, etc. For this reaction system, the following factors were mainly considered in the choice of solvent: (a) the solvent can dissolve  $\text{Cl}_2$  well; (b) it does not react with  $\text{Cl}_2$  and the substrate; (c) it is easy to separate after the reaction.

1,2-Dichloroethane (DCE) was placed in a 300 mL high-pressure reactor (316L; Anhui Kemi Machinery Technology Co., Ltd.), and added a certain amount of  $\text{Cl}_2$  to absorb and dissolve under different temperatures and pressures with 500 rpm magnetic stirring.

The amount of  $\text{Cl}_2$  dissolved in DCE was determined by the titration method.<sup>1</sup> A part of the dissolved solution was placed in the KI solution; dissolved  $\text{Cl}_2$  reacted with  $\text{I}^-$  to obtain  $\text{I}_2$ . Then the content of  $\text{I}_2$  was titrated by  $\text{Na}_2\text{S}_2\text{O}_3$  solution to determine the content of dissolved  $\text{Cl}_2$ .

The reaction situation of  $\text{Cl}_2$  and DCE was determined by the GC method. The solution after the reaction was taken as the GC sample for analysis. The GC sample (0.5  $\mu\text{L}$ ) was injected in the GC-2014 instrument (Shimadzu) equipped with a DB-FFAP column (length, 30 m; ID, 0.320 mm; film thickness, 0.25  $\mu\text{m}$ ). The oven temperature was maintained at 50  $^\circ\text{C}$  for 5 min, then increased to 240  $^\circ\text{C}$  by 15  $^\circ\text{C}/\text{min}$ , and then held for 5 min. The flow rate of the nitrogen as the carrier gas was 1.0 mL/min with a split ratio of 30:1; the injector and FID detector temperatures were set to 280  $^\circ\text{C}$  and 300  $^\circ\text{C}$ , respectively. The content of unreacted DCE was determined by using the area normalization method.

The dissolution and reaction of  $\text{Cl}_2$  in DCE was shown in Table S1. When the reaction temperature was lower than or equal to 60  $^\circ\text{C}$ , DCE hardly reacted with  $\text{Cl}_2$  even if extending the reaction time, and the unreacted DCE content remains over 96 wt% (Entry 2, Table S1). And the dissolved  $\text{Cl}_2$  content could be adjusted by controlling the temperature and pressure during absorption and dissolution (Entries 7-9, Table S1). For example, when the dissolving temperature was 40  $^\circ\text{C}$ , the dissolved  $\text{Cl}_2$  content

corresponding to the pressure of 0.1 MPa and 0.25 MPa was 5.0 wt% and 14.8 wt%, respectively. It indicated that DCE was a solvent that can dissolve Cl<sub>2</sub> and did not react with Cl<sub>2</sub>.

To this end, the dissolution of Cl<sub>2</sub> in DCE was controlled at a lower temperature (like 40 °C) to obtain a DCE solution with a certain chlorine content, and then the flow reaction at a high temperature (60 °C) was carried out. Since Cl<sub>2</sub> basically did not react with DCE at lower temperatures ( $\leq 40$  °C), and the residence time at high temperatures was extremely short (only a few seconds), it can be considered that the reaction of Cl<sub>2</sub> with DCE in the entire reaction process can be neglected. And the boiling point of DCE (83.7 °C) is higher than the reaction temperature, and it is easy to transport during the reaction and separate by vacuum distillation after the reaction. Therefore, DCE is a potential solvent to dissolve Cl<sub>2</sub> to carry out the liquid phase chlorination reaction.

**Table S1.** Situations of Cl<sub>2</sub> dissolved in DCE and reacted with DCE under different temperature and pressure

| <b>Entry</b> | <b>Temperature<br/>/°C</b> | <b>Time<br/>/h</b> | <b>Pressure<br/>/MPa</b> | <b>Dissolved Cl<sub>2</sub><br/>/wt%</b> | <b>Unreacted DCE<br/>/wt%</b> |
|--------------|----------------------------|--------------------|--------------------------|------------------------------------------|-------------------------------|
| 1            | 70                         | 2                  | 0.52                     | 8.0                                      | 90.6                          |
| 2            | 60                         | 2                  | 0.61                     | 10.4                                     | 96.6                          |
| 3            | 50                         | 2                  | 0.76                     | 18.7                                     | 97.1                          |
| 5            | 40                         | 5                  | 0.50                     | 28.5                                     | 99.6                          |
| 6            | 30                         | 3                  | 0.55                     | 42.2                                     | 99.5                          |
| 7            | 40                         | 2                  | 0.25                     | 14.8                                     | 99.7                          |
| 8            | 40                         | 2                  | 0.20                     | 10.1                                     | 99.7                          |
| 9            | 40                         | 2                  | 0.10                     | 5.0                                      | 99.8                          |

## HPLC-MS results analysis

Combining the results of HPLC-MS and existing standard compounds, the obtained products were analyzed to obtain the information of by-products. The obtained results are shown in Figure S1 and Table S2.

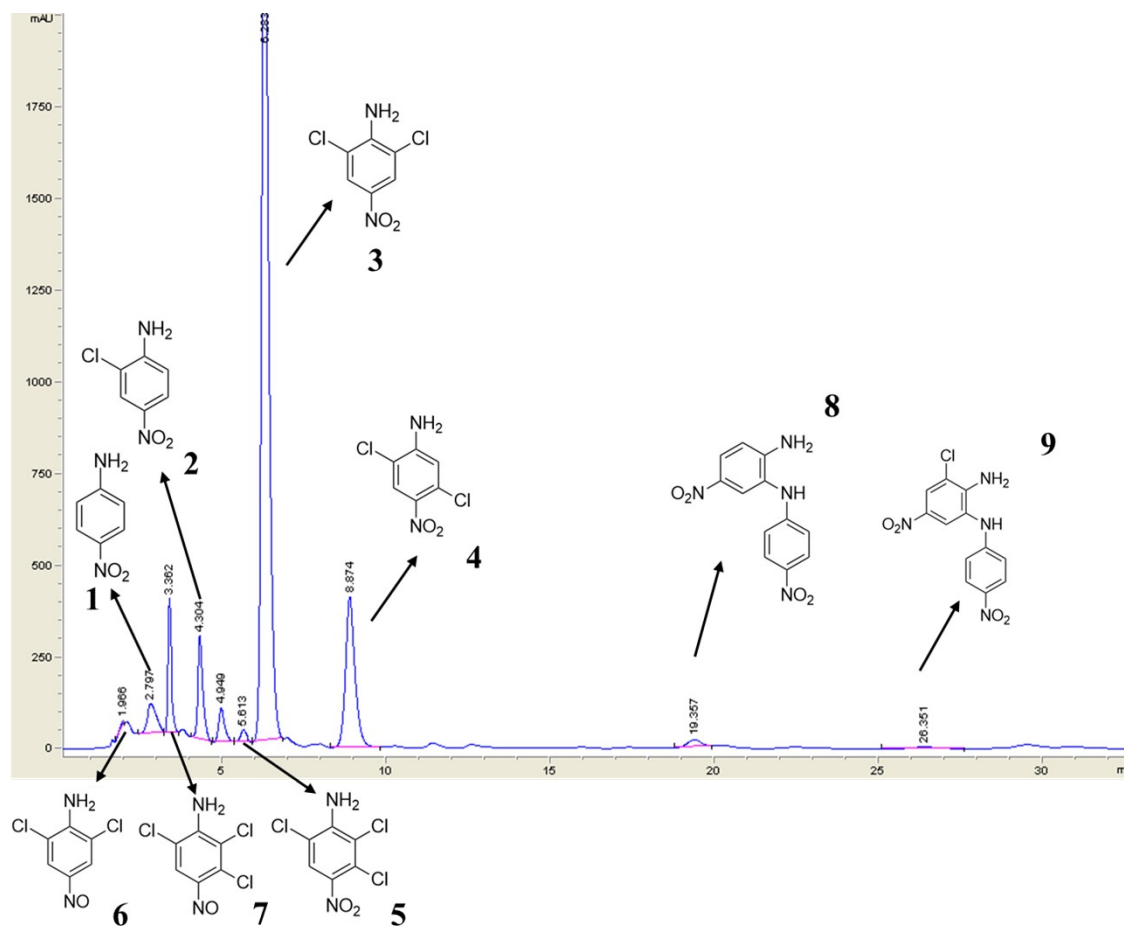

**Fig. S1.** HPLC-MS spectra

**Table S2.** Information of reacted sample by HPLC-MS analysis

| NO. | Name                        | Chemical<br>Formula                                                         | HRMS-ESI (m/z) ([M - H] <sup>-</sup> ) |           |
|-----|-----------------------------|-----------------------------------------------------------------------------|----------------------------------------|-----------|
|     |                             |                                                                             | Calcd                                  | Found     |
| 1   | 4-nitroaniline              | C <sub>6</sub> H <sub>6</sub> N <sub>2</sub> O <sub>2</sub>                 | 137.04293                              | 137.03558 |
| 2   | 2-chloro-4-nitroaniline     | C <sub>6</sub> H <sub>5</sub> ClN <sub>2</sub> O <sub>2</sub>               | 171.00396                              | 170.99660 |
| 3   | 2,6-dichloro-4-nitroaniline | C <sub>6</sub> H <sub>4</sub> Cl <sub>2</sub> N <sub>2</sub> O <sub>2</sub> | 204.96498                              | 204.95761 |
| 4   | 2,5-dichloro-4-nitroaniline | C <sub>6</sub> H <sub>4</sub> Cl <sub>2</sub> N <sub>2</sub> O <sub>2</sub> | 204.96498                              | 204.95753 |

|   |                                                                            |                      |           |           |
|---|----------------------------------------------------------------------------|----------------------|-----------|-----------|
| 5 | 2,3,6-trichloro-4-nitroaniline                                             | $C_6H_3Cl_3N_2O_2$   | 239.92601 | 239.90256 |
| 6 | 2,6-dichloro-4-nitrosoaniline                                              | $C_6H_4Cl_2N_2O$     | 188.97007 | 188.96283 |
| 7 | 2,3,6-trichloro-4-nitrosoaniline                                           | $C_6H_3Cl_3N_2O$     | 222.93110 | 222.92377 |
| 8 | 5-nitro- <i>N</i> <sup>1</sup> -(4-nitrophenyl)benzene-1,2-diamine         | $C_{12}H_{10}N_4O_4$ | 273.07020 | 273.06296 |
| 9 | <i>N</i> <sup>1</sup> -(2-chloro-4-nitrophenyl)-5-nitrobenzene-1,2-diamine | $C_{12}H_9ClN_4O_4$  | 307.03123 | 307.02386 |

### Interpretation on side reactions

To explore the effect of different additives on the stability of the product 2,6-dichloro-4-nitroaniline (DCNA) during the reaction, the product and different additives were reacted under batch conditions, and the result is as shown in Table S3. When there are acid and iron powder at the same time (Entries 2-5 in Table S3), the HPLC results indicated that a certain amount of 4-nitroaniline (PNA) appeared after the reaction. This may be due to the dechlorination reaction of DCNA in the environment of acid and metal ions. For this reason, the introduction of metal ions should be avoided as much as possible during the reaction, such as the use of non-metallic pipe fittings.

**Table S3.** Effect of different additives on the product

| Entry | Annexing agent                 |     |     |          | Mass fraction/% |          |           |             |                 |
|-------|--------------------------------|-----|-----|----------|-----------------|----------|-----------|-------------|-----------------|
|       | H <sub>2</sub> SO <sub>4</sub> | DCE | HCl | Fe power | PNA<br>1        | CNA<br>2 | DCNA<br>3 | Isomer<br>4 | Nitrous<br>6, 7 |
| 1     | ✓                              | ✓   | ✓   |          | 0.01            | 0.22     | 95.9      | 3.13        | 0.56            |
| 2     | ✓                              | ✓   |     | ✓        | 6.89            | 0.18     | 89.0      | 2.44        | 0.48            |
| 3     | ✓                              |     | ✓   | ✓        | 9.22            | 0.14     | 87.2      | 2.46        | 0.69            |
| 4     |                                | ✓   | ✓   | ✓        | 5.84            | 0.16     | 90.6      | 2.67        | 0.59            |
| 5     | ✓                              |     |     | ✓        | 36.4            | 0.11     | 60.1      | 2.12        | 1.03            |
| 6     | ✓                              |     | ✓   |          | 0.08            | 0.18     | 95.4      | 3.05        | 1.21            |
| 7     |                                | ✓   | ✓   |          | 0.00            | 0.24     | 95.8      | 3.33        | 0.44            |
| 8     |                                | ✓   |     | ✓        | 0.03            | 0.25     | 95.2      | 3.72        | 0.70            |

Reference conditions: Batch reaction with 500 rpm magnetic stirring; temperature, 50 °C; time, 4 h; usages of each substance: 3 g DCNA, 12 ml 98 wt% H<sub>2</sub>SO<sub>4</sub>, 22.8 g DCE, 1.81 g HCl, 1 g Fe power; dilute, neutralize and extract after the reaction. Sulfuric acid was used here to better dissolve the product for the reaction.

Furthermore, Table S4 shows the stability of the product under continuous flow using the DCNA as the raw material. When there was no Cl<sub>2</sub> in the DCE phase, the product was stable after passing through the reaction tube under the environment of acid and DCE. However, when there was Cl<sub>2</sub> in the DCE phase, the mass fraction of DCNA after the reaction was significantly reduced, and there appeared by-products like isomers, dimers, and nitrous substances. These results indicated that when excess chlorine was present, the product DCNA was more prone to participating in side reactions. They may be some reduction reactions involving some metal ions activated by Cl<sub>2</sub> in the system (some pipe fittings are inevitably made of metal). Therefore, on the one hand, it is necessary to control the use of chlorine; and on the other hand, it is required to quench the reaction in time to avoid side reactions.

**Table S4.** Effect of Cl<sub>2</sub> on products under continuous flow

| Entry | Acid phase                                                      | DCE phase                          | Mass fraction/% |          |           |             |               | Nitrous<br>6, 7 |
|-------|-----------------------------------------------------------------|------------------------------------|-----------------|----------|-----------|-------------|---------------|-----------------|
|       |                                                                 |                                    | PNA<br>1        | CNA<br>2 | DCNA<br>3 | Isomer<br>4 | Dimer<br>8, 9 |                 |
| 1     | 1 g DCNA in 4 ml<br>H <sub>2</sub> SO <sub>4</sub>              | DCE                                | 0.09            | 0.18     | 95.6      | 2.91        | 0.00          | 1.15            |
| 2     | 1 g DCNA in 4 ml<br>H <sub>2</sub> SO <sub>4</sub> and 1 ml HCl | DCE                                | 0.08            | 0.19     | 95.8      | 2.94        | 0.00          | 0.96            |
| 3     | 1 g DCNA in 4 ml<br>H <sub>2</sub> SO <sub>4</sub>              | DCE with<br>10 wt% Cl <sub>2</sub> | 0.82            | 0.14     | 15.4      | 36.4        | 23.2          | 24.1            |

Reference conditions: reaction tube, micropacked-bed reactor with 0.177-0.25 mm packing; reaction temperature, 60 °C; residence time, 20.4 s; flow rate of acid phase and DCE phase, 1.96 and 3.44 ml/min; dilute, neutralize and extract after the reaction. Sulfuric acid was used here to better dissolve the product for the reaction.

## References

- 1 N. W. Taylor and J. H. Hildebrand, *J. Am. Chem. Soc.*, 1923, **45**, 682-694.
